# Supplementary material
Source: PubMed Central journal article supplement (PMC3234723)
Supplement: supp_M111.277087_jbc.M111.277087-1.pdf [file supp_M111.277087_jbc.M111.277087-1.pdf]

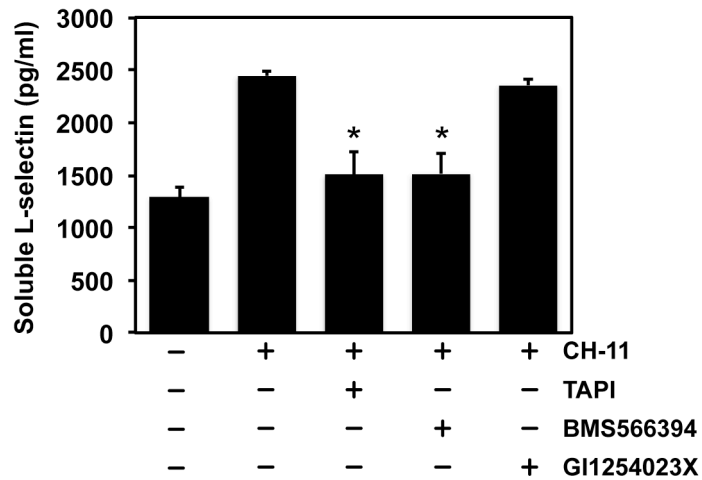

**Figure S1. Fas-induced L-selectin shedding involves ADAM17.** Human peripheral blood neutrophils were either untreated or treated with the anti-Fas antibody CH-11 for 6 hr at 37°C in the presence or absence of the metalloprotease inhibitors TAPI, BMS566394 (3µM), or GI1254023X (0.3µM). GI1254023X is 10-fold more selective for ADAM10 than ADAM17 and was used at a previously described concentration for whole cell assays (18,19). Cell supernatant levels of soluble L-selectin were quantified by ELISA. Shown is the mean ( $\pm$  SD) of at least three independent experiments. \*,  $p < 0.05$  vs. CH-11 treatment alone.
