# Supplementary material
Source: PubMed Central journal article supplement (PMC3234723)
Supplement: supp_M111.277087_jbc.M111.277087-2.pdf [file supp_M111.277087_jbc.M111.277087-2.pdf]

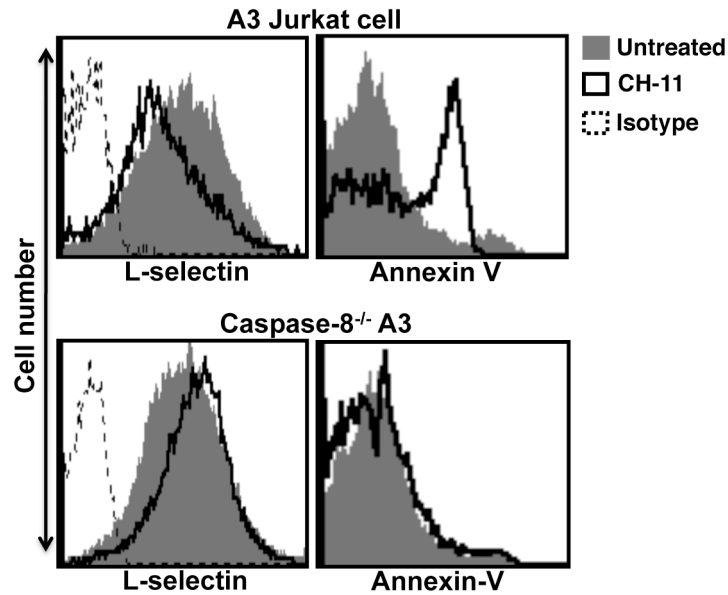

**Figure S2. Jurkat cells deficient in caspase-8 demonstrate reduced down-regulation in L-selectin surface expression upon Fas engagement.** Control (A3) and caspase-8-deficient (caspase-8<sup>-/-</sup> A3) Jurkat cells were either untreated or treated with the anti-Fas antibody CH-11 for 1.5 hr at 37°C prior to L-selectin detection and for 2 hr prior to phosphatidylserine detection. Relative L-selectin surface expression levels as well as annexin V-FITC staining were determined by flow cytometry. Negative control Ab staining of untreated cells is indicated. The x-axis = Log<sub>10</sub> fluorescence. Data are representative of at least three independent experiments.
