# Supplementary material
Source: PubMed Central journal article supplement (PMC3234723)
Supplement: supp_M111.277087_jbc.M111.277087-3.pdf [file supp_M111.277087_jbc.M111.277087-3.pdf]

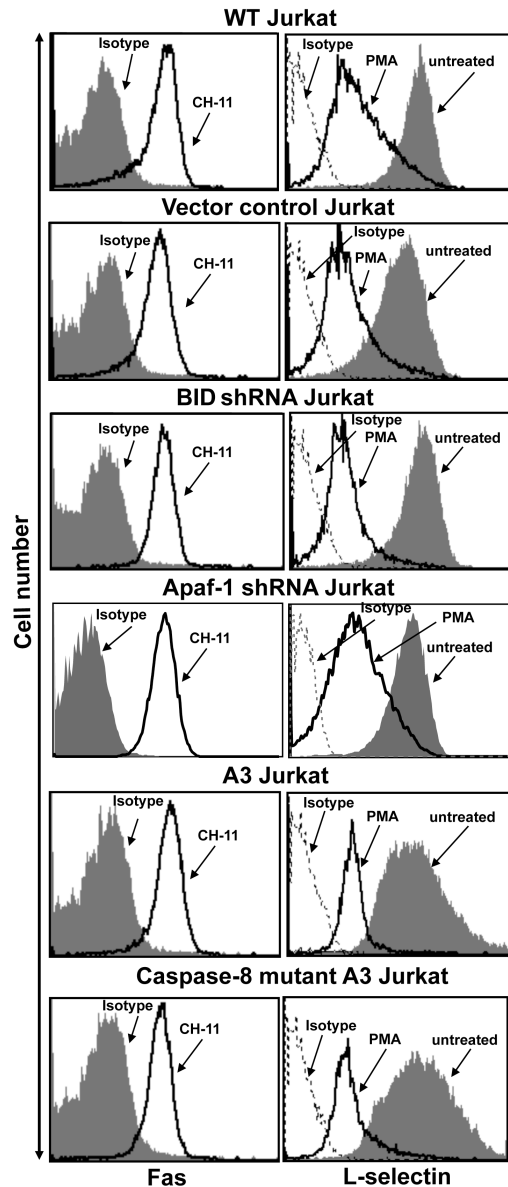

**Figure S3. Fas expression and ADAM17 activity by various Jurkat cell lines.** The different Jurkat cell lines used in our study, as indicated, were examined for their levels of Fas surface expression (left column). In addition, the Jurkat lines were either untreated or treated with PMA for 30 min at 37°C, and were examined for their levels of L-selectin surface expression (right column). Relative Fas and L-selectin expression levels were determined by flow cytometry. Negative control Ab staining of untreated cells is indicated (isotype). The x-axis = Log 10 fluorescence. Data are representative of at least three independent experiments.
