# Supplementary material
Source: PubMed Central journal article supplement (PMC3234723)
Supplement: supp_M111.277087_jbc.M111.277087-4.pdf [file supp_M111.277087_jbc.M111.277087-4.pdf]

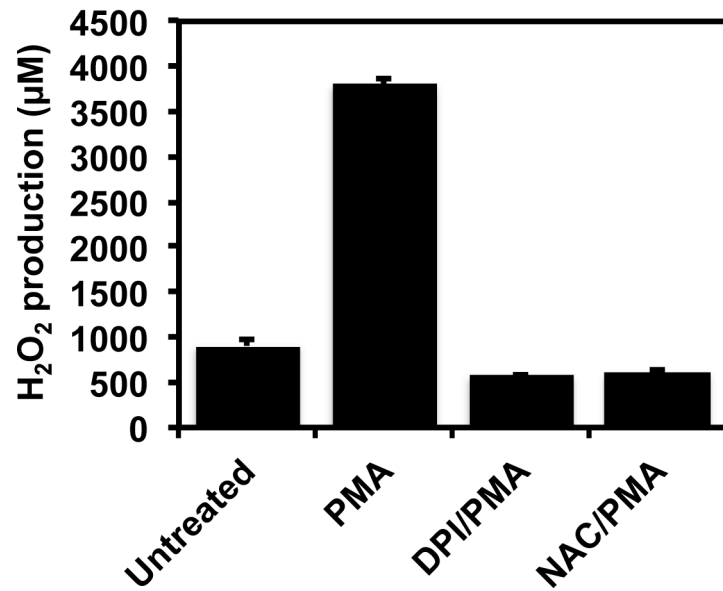

**Figure S4. DPI and NAC block ROS production by activated neutrophils.** Human peripheral blood neutrophils were either untreated or treated with PMA for 30 min at 37°C. Some neutrophils were initially incubated with the intracellular ROS scavenger NAC or the NADPH oxidase inhibitor DPI for 30 min at 25°C, as indicated. Fluorescence emission upon Amplex Red conversion was measured by a fluorescence plate reader. Data are representative of three independent experiments performed in triplicate and presented as means  $\pm$  SD.
