# Supplementary material
Source: PubMed Central journal article supplement (PMC3234723)
Supplement: supp_M111.277087_jbc.M111.277087-5.pdf [file supp_M111.277087_jbc.M111.277087-5.pdf]

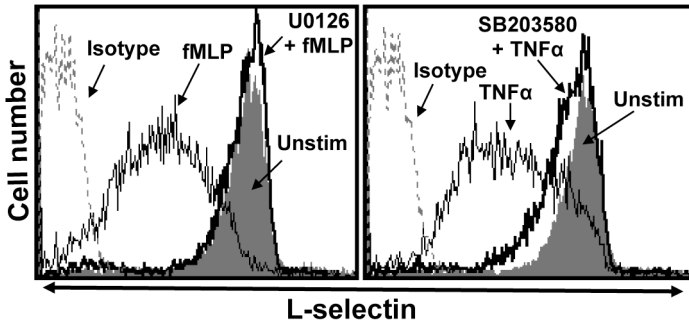

**Figure S5. Activation-induced L-selectin shedding requires the MAPK p38 and ERK.** Human peripheral blood neutrophils were either untreated or treated with fMLP or TNF $\alpha$  for 30 min at 37°C. Some cells were initially incubated with a p38 inhibitor (SB203580) or an ERK pathway inhibitor (U0126) for 30 min at 25°C, as indicated. Relative L-selectin surface expression levels were determined by flow cytometry. Negative control Ab staining of untreated cells is indicated (isotype). The x-axis = Log<sub>10</sub> fluorescence. Data are representative of at least three independent experiments.
