# Supplementary material
Source: PubMed Central journal article supplement (PMC3234723)
Supplement: supp_M111.277087_jbc.M111.277087-6.pdf [file supp_M111.277087_jbc.M111.277087-6.pdf]

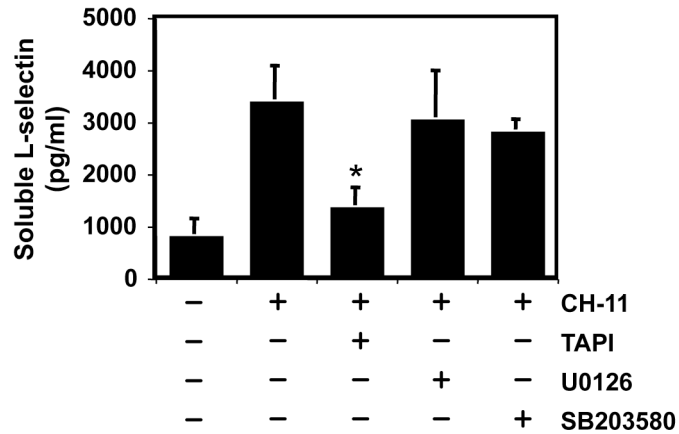

**Figure S6. The MAPK p38 and ERK are not involved in the induction of L-selectin shedding in Jurkat cells upon Fas engagement.** Jurkat cells were either untreated or treated with the anti-Fas antibody CH-11 in the presence or absence of TAPI for 1.5 hr at 37°C. Some cells were initially incubated with a p38 inhibitor (SB203580) or an ERK pathway inhibitor (U0126) for 30 min at 25°C, as indicated. Cell supernatant levels of soluble L-selectin were quantified by ELISA. Results are expressed as mean ( $\pm$  SD) of at least three independent experiments. \*,  $p < 0.05$  vs. CH-11 treatment alone.
